# Supplementary material for: Increasing the Efficacy of Treatment of Staphylococcus aureus–Candida albicans Mixed Infections with Myrtenol
Source: MDPI journal article supplement (doi:10.3390/antibiotics11121743), 2022-12-02
Supplement: s1 [file s1]

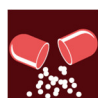

## Supplementary Materials

**Table S1.** MIC, FIC and FICI values of Amikacin in combination with either (-)-Myrtenol or (+)-Myrtenol (expressed in µg/mL) against various isolates of *S. aureus*.

| Strains               | MIC  |              | FIC |              | FICI         | MIC          |     | FIC          |              | FICI |
|-----------------------|------|--------------|-----|--------------|--------------|--------------|-----|--------------|--------------|------|
|                       | Amk  | (-)-Myrtenol | Amk | (-)-Myrtenol | (-)-Myrtenol | (+)-Myrtenol | Amk | (+)-Myrtenol | (+)-Myrtenol |      |
| <i>S. aureus</i> ATCC | 8    | 1024         | 0.5 | 256          | 0.30         | 512          | 2   | 128          |              | 0.50 |
| <i>S. aureus</i> 18   | 32   | 1024         | 8   | 256          | 0.50         | 1024         | 2   | 256          |              | 0.31 |
| <i>S. aureus</i> 25   | 16   | 1024         | 8   | 256          | 0.75         | 1024         | 1   | 256          |              | 0.31 |
| <i>S. aureus</i> 26   | 16   | 1024         | 8   | 256          | 0.75         | 512          | 8   | 128          |              | 0.75 |
| <i>S. aureus</i> 27   | 16   | 1024         | 2   | 256          | 0.38         | 512          | 8   | 128          |              | 0.50 |
| <i>S. aureus</i> 1053 | 512  | 1024         | 256 | 256          | 0.75         | 2048         | 128 | 512          |              | 0.38 |
| <i>S. aureus</i> 1065 | 256  | 1024         | 128 | 256          | 0.75         | 512          | 64  | 128          |              | 0.50 |
| <i>S. aureus</i> 1130 | 512  | 1024         | 256 | 256          | 0.75         | 512          | 128 | 128          |              | 0.38 |
| <i>S. aureus</i> 1145 | 1024 | 512          | 512 | 128          | 0.75         | 512          | 256 | 128          |              | 0.50 |
| <i>S. aureus</i> 1167 | 512  | 2048         | 32  | 512          | 0.31         | 512          | 256 | 128          |              | 0.75 |
| <i>S. aureus</i> 1168 | 8    | 2048         | 1   | 512          | 0.38         | 512          | 1   | 128          |              | 0.31 |
| <i>S. aureus</i> 1173 | 256  | 512          | 128 | 128          | 0.75         | 256          | 256 | 64           |              | 0.75 |

**Table S2.** Biofilm preventing concentrations (BPC), fractional biofilm preventing concentrations (FIC) and FICI values of Amikacin in combination with either (-)-Myrtenol or (+)-Myrtenol (expressed in µg/mL) against various isolates of *S. aureus*.

| Strains               | BPC  |              | FIC  |              | FICI         | BPC          |      | FIC          |              | FICI |
|-----------------------|------|--------------|------|--------------|--------------|--------------|------|--------------|--------------|------|
|                       | Amk  | (-)-Myrtenol | Amk  | (-)-Myrtenol | (-)-Myrtenol | (+)-Myrtenol | Amk  | (+)-Myrtenol | (+)-Myrtenol |      |
| <i>S. aureus</i> ATCC | 4    | 1024         | 0.5  | 256          | 0.38         | 512          | 2    | 256          |              | 1.00 |
| <i>S. aureus</i> 18   | 64   | 2048         | 64   | 256          | 1.12         | 1024         | 32   | 256          |              | 0.75 |
| <i>S. aureus</i> 25   | 64   | 512          | 32   | 256          | 1.00         | 512          | 2    | 256          |              | 0.50 |
| <i>S. aureus</i> 26   | 64   | 1024         | 32   | 256          | 0.75         | 1024         | 16   | 256          |              | 1.25 |
| <i>S. aureus</i> 27   | 32   | 1024         | 16   | 256          | 0.75         | 512          | 8    | 256          |              | 1.00 |
| <i>S. aureus</i> 1053 | 1024 | 2048         | 256  | 256          | 0.38         | 2048         | 256  | 256          |              | 0.38 |
| <i>S. aureus</i> 1065 | 1024 | 2048         | 1024 | 256          | 1.12         | 1024         | 1024 | 256          |              | 1.25 |
| <i>S. aureus</i> 1130 | 128  | 512          | 64   | 256          | 1.00         | 512          | 512  | 256          |              | 1.00 |
| <i>S. aureus</i> 1145 | 1024 | 1024         | 128  | 128          | 0.25         | 1024         | 512  | 128          |              | 0.63 |
| <i>S. aureus</i> 1167 | 512  | 2048         | 32   | 512          | 0.31         | 2048         | 128  | 512          |              | 0.31 |
| <i>S. aureus</i> 1168 | 32   | 2048         | 1    | 512          | 0.28         | 2048         | 1    | 512          |              | 0.31 |
| <i>S. aureus</i> 1173 | 256  | 1024         | 128  | 128          | 0.625        | 256          | 512  | 128          |              | 1.50 |

**Table S3.** MIC, FIC and FICI values of Benzalkonium Chloride (BAC) in combination with either (-)-Myrtenol or (+)-Myrtenol (expressed in µg/mL) against various isolates of *S. aureus*.

| Strains               | MIC |              | FIC |              | FICI         | MIC          |      | FIC          |              | FICI         |
|-----------------------|-----|--------------|-----|--------------|--------------|--------------|------|--------------|--------------|--------------|
|                       | BAC | (-)-Myrtenol | BAC | (-)-Myrtenol | (-)-Myrtenol | (+)-Myrtenol | BAC  | (+)-Myrtenol | (+)-Myrtenol | (+)-Myrtenol |
| <i>S. aureus</i> ATCC | 1   | 1024         | 1   | 256          | 1.25         | 512          | 1    | 128          | 0.75         |              |
| <i>S. aureus</i> 18   | 1   | 1024         | 0.5 | 256          | 0.75         | 1024         | 0.25 | 256          | 0.5          |              |
| <i>S. aureus</i> 25   | 0.5 | 1024         | 1   | 256          | 2.25         | 1024         | 0.25 | 256          | 0.5          |              |
| <i>S. aureus</i> 26   | 1   | 1024         | 0.5 | 256          | 0.75         | 512          | 1    | 128          | 0.75         |              |
| <i>S. aureus</i> 27   | 1   | 1024         | 0.5 | 256          | 0.75         | 512          | 1    | 128          | 0.75         |              |
| <i>S. aureus</i> 1053 | 2   | 1024         | 1   | 256          | 0.75         | 2048         | 0.5  | 512          | 0.5          |              |
| <i>S. aureus</i> 1065 | 2   | 1024         | 1   | 256          | 0.75         | 512          | 2    | 128          | 1.25         |              |
| <i>S. aureus</i> 1130 | 2   | 1024         | 1   | 256          | 0.75         | 512          | 1    | 128          | 0.75         |              |
| <i>S. aureus</i> 1145 | 1   | 512          | 1   | 128          | 1.25         | 512          | 0.5  | 128          | 0.5          |              |
| <i>S. aureus</i> 1167 | 2   | 2048         | 0.5 | 512          | 0.5          | 512          | 1    | 128          | 1.25         |              |
| <i>S. aureus</i> 1168 | 1   | 2048         | 0.5 | 512          | 0.75         | 512          | 1    | 128          | 1.25         |              |
| <i>S. aureus</i> 1173 | 1   | 512          | 1   | 128          | 1.25         | 256          | 1    | 64           | 1.25         |              |

**Table S4.** Biofilm preventing concentrations (BPC), fractional biofilm preventing concentrations (FIC) and FICI values of Benzalkonium Chloride (BAC) in combination with either (-)-Myrtenol or (+)-Myrtenol (expressed in µg/mL) against various isolates of *S. aureus*.

| Strains               | BPC |              | FIC  |              | FICI         | BPC          |      | FIC          |              | FICI         |
|-----------------------|-----|--------------|------|--------------|--------------|--------------|------|--------------|--------------|--------------|
|                       | BAC | (-)-Myrtenol | BAC  | (-)-Myrtenol | (-)-Myrtenol | (+)-Myrtenol | BAC  | (+)-Myrtenol | (+)-Myrtenol | (+)-Myrtenol |
| <i>S. aureus</i> ATCC | 1   | 1024         | 0.5  | 256          | 0.75         | 512          | 1    | 256          | 1.50         |              |
| <i>S. aureus</i> 18   | 1   | 2048         | 0.5  | 256          | 0.63         | 1024         | 0.5  | 256          | 0.75         |              |
| <i>S. aureus</i> 25   | 1   | 512          | 1    | 256          | 1.50         | 512          | 0.25 | 256          | 0.75         |              |
| <i>S. aureus</i> 26   | 1   | 1024         | 0.5  | 256          | 0.75         | 1024         | 0.03 | 256          | 0.28         |              |
| <i>S. aureus</i> 27   | 1   | 1024         | 0.25 | 256          | 0.50         | 512          | 1    | 256          | 1.50         |              |
| <i>S. aureus</i> 1053 | 2   | 2048         | 1    | 256          | 0.63         | 2048         | 0.5  | 256          | 0.38         |              |
| <i>S. aureus</i> 1065 | 1   | 2048         | 0.06 | 256          | 0.19         | 1024         | 2    | 256          | 2.25         |              |
| <i>S. aureus</i> 1130 | 2   | 512          | 1    | 256          | 1.00         | 512          | 1    | 256          | 1.00         |              |
| <i>S. aureus</i> 1145 | 2   | 1024         | 0.06 | 128          | 0.16         | 1024         | 1    | 128          | 0.63         |              |
| <i>S. aureus</i> 1167 | 2   | 2048         | 0.25 | 512          | 0.38         | 2048         | 1    | 512          | 0.75         |              |
| <i>S. aureus</i> 1168 | 1   | 2048         | 0.12 | 512          | 0.38         | 2048         | 1    | 512          | 1.25         |              |
| <i>S. aureus</i> 1173 | 1   | 1024         | 0.03 | 128          | 0.16         | 256          | 0.03 | 128          | 0.53         |              |

**Table S5.** MIC, FIC and FICI values of Fluconazole in combination with either (-)-Myrtenol or (+)-Myrtenol (expressed in µg/mL) against various isolates of *C. albicans*.

| strains                 | MIC |                  | FIC |                  | FICI             | MIC              |     | FIC              | FICI             |
|-------------------------|-----|------------------|-----|------------------|------------------|------------------|-----|------------------|------------------|
|                         | Flu | (-)-<br>Myrtenol | Flu | (-)-<br>Myrtenol | (-)-<br>Myrtenol | (+)-<br>Myrtenol | Flu | (+)-<br>Myrtenol | (+)-<br>Myrtenol |
| <i>C. albicans</i> ATCC | 512 | 1024             | 512 | 256              | 1.25             | 1024             | 8   | 256              | 0.27             |
| <i>C. albicans</i> 661  | 512 | 1024             | 512 | 256              | 1.25             | 2048             | 256 | 512              | 0.75             |
| <i>C. albicans</i> 672  | 512 | 1024             | 8   | 256              | 0.27             | 2048             | 8   | 512              | 0.50             |
| <i>C. albicans</i> 688  | 512 | 1024             | 512 | 256              | 1.25             | 2048             | 256 | 512              | 0.75             |
| <i>C. albicans</i> 701  | 512 | 2048             | 16  | 512              | 0.28             | 2048             | 8   | 512              | 0.27             |
| <i>C. albicans</i> 703  | 64  | 1024             | 8   | 256              | 0.38             | 1024             | 8   | 256              | 0.27             |
| <i>C. albicans</i> 722  | 8   | 2048             | 8   | 512              | 1.25             | 1024             | 8   | 256              | 1.25             |
| <i>C. albicans</i> 748  | 512 | 1024             | 512 | 256              | 1.25             | 2048             | 8   | 512              | 0.27             |
| <i>C. albicans</i> 761  | 8   | 1024             | 8   | 256              | 1.25             | 2048             | 8   | 512              | 1.25             |
| <i>C. albicans</i> 762  | 512 | 1024             | 512 | 256              | 1.25             | 2048             | 8   | 512              | 0.27             |
| <i>C. albicans</i> 763  | 512 | 2048             | 8   | 512              | 0.27             | 2048             | 128 | 512              | 0.50             |

**Table S6.** Biofilm preventing concentrations (BPC), fractional biofilm preventing concentrations (FIC) and FICI values of Fluconazole in combination with either (-)-Myrtenol or (+)-Myrtenol (expressed in µg/mL) against various isolates of *C. albicans*.

| Strains                 | BPC |                  | FIC |                  | FICI             | BPC              |     | FIC              | FICI             |
|-------------------------|-----|------------------|-----|------------------|------------------|------------------|-----|------------------|------------------|
|                         | Flu | (-)-<br>Myrtenol | Flu | (-)-<br>Myrtenol | (-)-<br>Myrtenol | (+)-<br>Myrtenol | Flu | (+)-<br>Myrtenol | (+)-<br>Myrtenol |
| <i>C. albicans</i> ATCC | 512 | 1024             | 512 | 256              | 1.25             | 1024             | 64  | 256              | 0.75             |
| <i>C. albicans</i> 661  | 512 | 1024             | 512 | 256              | 1.25             | 2048             | 512 | 512              | 1.25             |
| <i>C. albicans</i> 672  | 512 | 1024             | 16  | 256              | 0.28             | 2048             | 8   | 512              | 0.50             |
| <i>C. albicans</i> 688  | 512 | 1024             | 8   | 256              | 0.26             | 2048             | 512 | 512              | 1.25             |
| <i>C. albicans</i> 701  | 512 | 2048             | 256 | 512              | 0.75             | 2048             | 256 | 512              | 0.75             |
| <i>C. albicans</i> 703  | 128 | 1024             | 8   | 256              | 0.31             | 1024             | 32  | 256              | 4.25             |
| <i>C. albicans</i> 722  | 64  | 2048             | 8   | 512              | 0.37             | 1024             | 64  | 256              | 0.40             |
| <i>C. albicans</i> 748  | 512 | 1024             | 8   | 256              | 0.26             | 2048             | 512 | 512              | 1.25             |
| <i>C. albicans</i> 761  | 512 | 1024             | 64  | 256              | 0.37             | 2048             | 128 | 512              | 0.50             |
| <i>C. albicans</i> 762  | 512 | 1024             | 512 | 256              | 1.25             | 2048             | 512 | 512              | 1.25             |
| <i>C. albicans</i> 763  | 512 | 2048             | 256 | 512              | 0.75             | 2048             | 8   | 512              | 0.30             |

**Table S7.** MIC, FIC and FICI values of Benzalkonium Chloride (BAC) in combination with either (-)-Myrtenol or (+)-Myrtenol (expressed in µg/mL) against various isolates of *C. albicans*.

| Strains                 | MIC |              | FIC   |              | FICI         | MIC          |       | FIC          | FICI         |
|-------------------------|-----|--------------|-------|--------------|--------------|--------------|-------|--------------|--------------|
|                         | BAC | (-)-Myrtenol | BAC   | (-)-Myrtenol | (-)-Myrtenol | (+)-Myrtenol | BAC   | (+)-Myrtenol | (+)-Myrtenol |
| <i>C. albicans</i> ATCC | 1   | 1024         | 0.125 | 256          | 0.38         | 1024         | 0.125 | 256          | 0.50         |
| <i>C. albicans</i> 661  | 0.5 | 1024         | 0.25  | 256          | 0.75         | 2048         | 0.125 | 512          | 0.38         |
| <i>C. albicans</i> 672  | 0.5 | 1024         | 0.25  | 256          | 0.75         | 2048         | 0.125 | 512          | 0.50         |
| <i>C. albicans</i> 688  | 0.5 | 1024         | 0.125 | 256          | 0.50         | 2048         | 0.25  | 512          | 0.50         |
| <i>C. albicans</i> 701  | 1   | 2048         | 0.5   | 512          | 0.75         | 2048         | 0.25  | 512          | 0.75         |
| <i>C. albicans</i> 703  | 0.5 | 1024         | 0.25  | 256          | 0.75         | 1024         | 0.25  | 256          | 0.50         |
| <i>C. albicans</i> 722  | 0.5 | 2048         | 0.125 | 512          | 0.50         | 1024         | 0.125 | 256          | 0.50         |
| <i>C. albicans</i> 748  | 1   | 1024         | 0.5   | 256          | 0.75         | 2048         | 0.25  | 512          | 0.50         |
| <i>C. albicans</i> 761  | 0.5 | 1024         | 0.25  | 256          | 0.75         | 2048         | 0.125 | 512          | 0.50         |
| <i>C. albicans</i> 762  | 1   | 1024         | 0.125 | 256          | 0.38         | 2048         | 0.25  | 512          | 0.50         |
| <i>C. albicans</i> 763  | 0.5 | 2048         | 0.125 | 512          | 0.50         | 2048         | 0.25  | 512          | 1.25         |

**Table S8.** Biofilm preventing concentrations (BPC), fractional biofilm preventing concentrations (FIC) and FICI values of Benzalkonium Chloride (BAC) in combination with either (-)-Myrtenol or (+)-Myrtenol (expressed in µg/mL) against various isolates of *C. albicans*.

| Strains                 | BPC   |              | FIC   |              | FICI         | BPC          |       | FIC          | FICI         |
|-------------------------|-------|--------------|-------|--------------|--------------|--------------|-------|--------------|--------------|
|                         | BAC   | (-)-Myrtenol | BAC   | (-)-Myrtenol | (-)-Myrtenol | (+)-Myrtenol | BAC   | (+)-Myrtenol | (+)-Myrtenol |
| <i>C. albicans</i> ATCC | 0.25  | 1024         | 0.125 | 256          | 0.75         | 1024         | 0.125 | 256          | 0.38         |
| <i>C. albicans</i> 661  | 0.125 | 2048         | 0.125 | 512          | 1.25         | 1024         | 0.125 | 256          | 0.50         |
| <i>C. albicans</i> 672  | 1     | 2048         | 0.125 | 512          | 0.38         | 1024         | 0.125 | 256          | 0.75         |
| <i>C. albicans</i> 688  | 0.5   | 2048         | 0.25  | 512          | 0.75         | 1024         | 0.125 | 256          | 0.75         |
| <i>C. albicans</i> 701  | 0.5   | 2048         | 0.125 | 512          | 0.50         | 2048         | 0.125 | 512          | 0.38         |
| <i>C. albicans</i> 703  | 0.25  | 1024         | 0.125 | 256          | 0.75         | 1024         | 0.125 | 256          | 0.75         |
| <i>C. albicans</i> 722  | 0.125 | 1024         | 0.125 | 256          | 1.25         | 2048         | 0.25  | 512          | 0.31         |
| <i>C. albicans</i> 748  | 1     | 2048         | 0.5   | 512          | 0.75         | 1024         | 0.125 | 256          | 0.50         |
| <i>C. albicans</i> 761  | 1     | 2048         | 0.125 | 512          | 0.38         | 1024         | 0.25  | 256          | 0.50         |
| <i>C. albicans</i> 762  | 1     | 2048         | 0.25  | 512          | 0.50         | 1024         | 0.125 | 256          | 0.38         |
| <i>C. albicans</i> 763  | 0.5   | 2048         | 0.25  | 512          | 0.75         | 2048         | 0.125 | 512          | 0.50         |
